# Supplementary material
Source: ML conference proceedings conference paper supplement (https://proceedings.neurips.cc/paper_files/paper/2022/hash/c43b2989b1ba055aa713a4abbe4a8b05-Abstract.html)
Supplement: Supplementary file 1 [file c43b2989b1ba055aa713a4abbe4a8b05-Supplemental-Conference.zip]

Archive with 2 entries (2 files):
- LECO_NeurIPS2022_suppl.pdf
- __MACOSX/._LECO_NeurIPS2022_suppl.pdf
